# Supplementary material for: Emergence of methicillin-resistant Staphylococcus pseudintermedius (MRSP) in dogs in the island nation of Grenada, West Indies
Source: Research Square preprint supplement (doi:10.21203/rs.3.rs-6306236/v1), 2025-07-23
Supplement: Supplementary file 1 [file 060df14ee0cd87e44ce00b72.docx]

**Bacterial growth and DNA extraction**

Isolates were stored in -80oC were grown onto Columbia blood agar plates (Hardy Diagonistic, Ca USA) at 37oC. One colony was picked and place in BHI broth (Hardy, Ca USA) at 37oC at 180 rpm shaking overnight. Next 2 mls was centrifuged at 4800 g for 5 mins and wash with 1XPBS (Fisher Sci, ). Next the isolate was heated to 100oC for 15 mins. Then centrifuged for 10 mins at 8300g. The supernatant was then transferred to a 1.5 ml tube and stored at -20 until used for PCR.

**MLVA Primers**

MLVA primers were developed using both Tandem Repeat Finder version 2.0 (<https://tandem.bu.edu/cgi-bin/trdb/trdb.exe?taskid=1>) and Geneious 11.0 using 10 genomes that we sequenced and 4 that were publicly available. The different genomes were uploaded and to the database and the repeats were screened within the Geneious software. All repeats were identified within each genome and then aligned using MAFFTv 7.388 to identify the repeat regions. Repeats that showed differences were selected to be turned into primers using Geneious Primer3 software. Each primer was tested as in individual and checked against many isolates to see if there were differences within the bands sizes. We stated with 13 primers and ended up with eight primers (regions) that showed differences with the repeat region. If the primers had difference the primer was then moved into one of two multiplexes.

**MLVA PCR**

Two multiplexes were developed to perform the MLVA reaction. Reaction 1 contained VNTR_10FAM, VNTR_12NED, VNTR_6NED, and VNTR_8PET at the primer concentration listed below (table 2). Reaction 2 contained VNTR_4PET, VNTR5_VIC, VNTR_7FAM, VNTR_11 at the concentration listed below (table 2). Both reactions used Qiagen Multiplex Master Mix Kit (Qiagen, Hilden, Germany) with 1 ul of supernatant from the bacterial extractions for a total a volume 10ul. PRC parameters were as followed: initial denaturation (15 min at 95OC), 30 cycles of amplification (90 sec at 95OC, 90 sec at 55OC, and 90sec at 72OC) followed by elongation step of 10 mins at 72OC.

Once the PCR, samples were diluted into 1:20 in water. 1 ml of the diluted solution mix in with 0.5 ul of 600 LIZ size standard (Applied Biosystems) and formamide (Applied Biosystems). The mixture was then denatured by incubation for 5 mins at 95OC and then run on an ABI 3730. Results were analyzed in GeneMarker V2.7.0 software.

| **VNTR** | **Region** | **Repeat size** | **Start** | **Stop** |
| --- | --- | --- | --- | --- |
| VNTR 6 | Dru-region | 40bp | 36608 | 37107 |
| VNTR 8 | NON-coding | 28bp | 932914 | 933169 |
| VNTR 10 | Class A beta-lactamase | 12bp | 2630421 | 2630828 |
| VNTR 12 | Cyclic-di-AMP phosphodiesterase GdpP CDS | 12 bp | 18296 | 18413 |
| VNTR 4 | Zinc ABC transporter, substrate-binding lipoprotein AdcA CDS | 18bp | 291166 | 291526 |
| VNTR 5 | Translation initiation factor 2 CDS | 18bp | 1629034 | 1629474 |
| VNTR 7 | Beta-lactamase regulatory sensor-transducer BlaR1 CDS | 31bp | 2631419 | 2631968 |
| VNTR 11 | hypothetical protein CDS | 6bp | 2392234 | 2392414 |

| **VNTR** | **DYE** | **Primer Forward** | **Primer Reverse** | **RXN** | **Conc.** |
| --- | --- | --- | --- | --- | --- |
| VNTR6 | NED | GGAGTTAATCTACGTCTCATCTCA | TCGGTTGTAATTTTCATTTTTATACGC | 1 | 0.32 |
| VNTR 8 | PET | AAGCGTTGGTTAGTTGAAGGA | ACATCGTTGGTGACTCCTTT | 1 | 0.2 |
| VNTR 10 | FAM | ACGTTGCTTTTTCGATTGAT | GCTGATAAAAGTGGTCAAGC | 1 | 0.4 |
| VNTR 12 | NED | TGTCATGCTCATTATCAGTGT | CATTGTTTTGACTGCACGAT | 1 | 0.2 |
| VNTR 4 | PET | TGAGCCGACACAAAAAGATA | TGGATCATAACCCCCATGA | 2 | 0.2 |
| VNTR 5 | VIC | ACCGTAATCAGATGCAACTA | GAAGATGACCAAGTGAAAGC | 2 | 0.2 |
| VNTR 7 | FAM | CTTTGGCATGTGAACTGTTT | AAACTATCCAAATAACTGTGCA | 2 | 0.4 |
| VNTR 11 | FAM | TAATATCATCAACTGCCGCA | CCTTTGAGTAACGCGATATC | 2 | 0.2 |
