# Supplementary material for: Emergence of methicillin-resistant Staphylococcus pseudintermedius (MRSP) in dogs in the island nation of Grenada, West Indies
Source: Research Square preprint supplement (doi:10.21203/rs.3.rs-6306236/v1), 2025-07-23
Supplement: Supplementary file 2 [file 07b3233510f5fefd88a46c32.xlsx]

## Sheet: Table 2
Dog category	Oral samples				Perianal samples				Skin lesion swabs				Total n samples
	n samples	n positive samples	% positive		n samples	n positive samples	% positive		n samples	n positive samples	% positive		n samples	n positive samples	% positive
Local dogs	119	38	31.9328		119	40	33.6134		5	2	40		243	80	32.9218
Visiting dogs	74	34	45.9459		74	26	35.1351		19	3	15.7895		167	63	37.7246
Dogs with CD	5	1	20		5	2	40		5	2	40		15	5	33.3333
Total	198	73	36.8687		198	68	34.3434		29	7	24.1379		425	148	34.8235
