# Supplementary material for: Emergence of methicillin-resistant Staphylococcus pseudintermedius (MRSP) in dogs in the island nation of Grenada, West Indies
Source: Research Square preprint supplement (doi:10.21203/rs.3.rs-6306236/v1), 2025-07-23
Supplement: Supplementary file 3 [file 4768d5b21941e0afad9585b3.xlsx]

## Sheet: Table 3
Table 3: Frequency of S. pseudintermedius isolated from environmental surfaces at the Small Animal Clinic, SVM SGU, Grenada
Area	Animal contact surfaces				Human contact surfaces				Animal and human surfaces
	n samples	n positive	% positive		n samples	n positive	% positive		Total n	n positive	% positive
Consultation room	7	3	42.8571		7	1	14.2857		14	4	28.5714
Treatment room	7	2	28.5714		7	0	0		14	2	14.2857
Anesthesia room	7	0	0		7	0	0		14	0	0
Surgical suite	7	0	0		7	0	0		14	0	0
Outpatient hallway	7	1	14.2857		na	na	na		7	1	14.2857
Inpatient hallway	7	1	14.2857		na	na	na		7	1	14.2857
Work station	na	na	na		7	1	14.2857		7	1	14.2857
Laboratory	na	na	na		7	1	14.2857		7	1	14.2857
Total	42	7	16.6667		42	3	7.14286		84	10	11.9048
na: not applicable, SP: Staphylococcus pseudintermedius
