# Supplementary material for: Emergence of methicillin-resistant Staphylococcus pseudintermedius (MRSP) in dogs in the island nation of Grenada, West Indies
Source: Research Square preprint supplement (doi:10.21203/rs.3.rs-6306236/v1), 2025-07-23
Supplement: Supplementary file 4 [file 5c728721fee94de885f1e67d.docx]

**Table A1** Frequency of MLVA types identified in 158 *Staphylococcus pseudintermedius* isolates in dogs and environmental surfaces at a small animal clinic

| MLVA type | CD | ES | LD | VD | n isolates |
| --- | --- | --- | --- | --- | --- |
| 1 | 0 | 0 | 1 | 0 | 1 |
| 2 | 0 | 0 | 1 | 0 | 1 |
| 3 | 0 | 0 | 1 | 0 | 1 |
| 4 | 0 | 0 | 0 | 1 | 1 |
| 5 | 0 | 0 | 1 | 0 | 1 |
| 6 | 0 | 0 | 0 | 1 | 1 |
| 7 | 0 | 0 | 0 | 2 | 2 |
| 8 | 0 | 1 | 1 | 0 | 2 |
| 9 | 0 | 0 | 1 | 0 | 1 |
| 10 | 0 | 0 | 0 | 2 | 2 |
| 11 | 0 | 1 | 0 | 0 | 1 |
| 12 | 0 | 0 | 0 | 1 | 1 |
| 13 | 0 | 0 | 0 | 1 | 1 |
| 14 | 0 | 1 | 0 | 0 | 1 |
| 15 | 0 | 0 | 1 | 0 | 1 |
| 16 | 0 | 0 | 1 | 0 | 1 |
| 17 | 0 | 1 | 0 | 0 | 1 |
| 18 | 0 | 0 | 0 | 1 | 1 |
| 19 | 0 | 0 | 2 | 0 | 2 |
| 20 | 0 | 0 | 1 | 0 | 1 |
| 21 | 0 | 0 | 0 | 1 | 1 |
| 22 | 0 | 0 | 1 | 1 | 2 |
| 23 | 0 | 0 | 0 | 1 | 1 |
| 24 | 0 | 0 | 0 | 1 | 1 |
| 25 | 0 | 0 | 0 | 1 | 1 |
| 26 | 0 | 0 | 0 | 1 | 1 |
| 27 | 0 | 0 | 0 | 1 | 1 |
| 28 | 0 | 0 | 7 | 0 | 7 |
| 29 | 0 | 0 | 0 | 3 | 3 |
| 30 | 0 | 0 | 2 | 3 | 5 |
| 31 | 1 | 0 | 0 | 1 | 2 |
| 32 | 0 | 0 | 1 | 0 | 1 |
| 33 | 1 | 0 | 0 | 0 | 1 |
| 34 | 0 | 1 | 0 | 0 | 1 |
| 35 | 0 | 0 | 0 | 1 | 1 |
| 36 | 0 | 0 | 0 | 2 | 2 |
| 37 | 0 | 1 | 0 | 0 | 1 |
| 38 | 0 | 0 | 0 | 1 | 1 |
| 39 | 0 | 0 | 2 | 0 | 2 |
| 40 | 0 | 0 | 3 | 0 | 3 |
| 41 | 0 | 0 | 1 | 0 | 1 |
| 42 | 0 | 0 | 1 | 0 | 1 |
| 43 | 0 | 0 | 2 | 0 | 2 |
| 44 | 0 | 0 | 1 | 0 | 1 |
| 45 | 0 | 0 | 2 | 0 | 2 |
| 46 | 0 | 0 | 2 | 0 | 2 |
| 47 | 0 | 0 | 1 | 0 | 1 |
| 48 | 0 | 0 | 3 | 0 | 3 |
| 49 | 0 | 0 | 1 | 0 | 1 |
| 50 | 0 | 0 | 1 | 1 | 2 |
| 51 | 0 | 0 | 0 | 1 | 1 |
| 52 | 0 | 0 | 1 | 1 | 2 |
| 53 | 0 | 0 | 3 | 1 | 4 |
| 54 | 0 | 0 | 2 | 0 | 2 |
| 55 | 0 | 0 | 1 | 0 | 1 |
| 56 | 0 | 0 | 0 | 2 | 2 |
| 57 | 0 | 0 | 6 | 0 | 6 |
| 58 | 0 | 0 | 0 | 1 | 1 |
| 59 | 0 | 0 | 1 | 0 | 1 |
| 60 | 0 | 0 | 1 | 0 | 1 |
| 61 | 0 | 1 | 4 | 1 | 6 |
| 62 | 1 | 0 | 2 | 0 | 3 |
| 63 | 0 | 0 | 3 | 0 | 3 |
| 64 | 0 | 0 | 0 | 3 | 3 |
| 65 | 0 | 0 | 0 | 1 | 1 |
| 66 | 0 | 0 | 0 | 1 | 1 |
| 67 | 0 | 0 | 0 | 2 | 2 |
| 68 | 0 | 0 | 0 | 1 | 1 |
| 69 | 0 | 0 | 1 | 0 | 1 |
| 70 | 0 | 0 | 2 | 0 | 2 |
| 71 | 0 | 1 | 2 | 3 | 6 |
| 72 | 0 | 0 | 0 | 1 | 1 |
| 73 | 0 | 0 | 0 | 1 | 1 |
| 74 | 0 | 0 | 0 | 1 | 1 |
| 75 | 0 | 0 | 0 | 3 | 3 |
| 76 | 0 | 1 | 0 | 3 | 4 |
| 77 | 2 | 0 | 0 | 0 | 2 |
| 78 | 0 | 1 | 2 | 0 | 3 |
| 79 | 0 | 0 | 0 | 2 | 2 |
| 80 | 0 | 0 | 0 | 1 | 1 |
| 81 | 0 | 0 | 2 | 2 | 4 |
| 82 | 0 | 0 | 0 | 1 | 1 |
| 83 | 0 | 0 | 0 | 1 | 1 |
| 84 | 1 | 0 | 0 | 0 | 1 |
| 85 | 0 | 0 | 1 | 0 | 1 |
| 86 | 0 | 0 | 1 | 0 | 1 |
| 87 | 0 | 0 | 2 | 0 | 2 |
| 88 | 0 | 0 | 0 | 1 | 1 |

MLVA, multiple number of tandem repeats analysis; CD, dogs with clinical dermatitis; ES, environmental surfaces; LD, local dogs; VD, visitor dogs

**Table A2** Summary of epidemiological data obtained from questionnaire administered to 85 dog owners

| Variable | n dogs | % |
| --- | --- | --- |
| Country of birth/origin (n=85) |  |  |
| Europe | 14 | 16.5 |
| Grenada | 27 | 31.8 |
| North America | 43 | 50.6 |
| Asia | 1 | 1.2 |
| Gender (n=85) |  |  |
| Male | 44 | 51.8 |
| Female | 41 | 48.2 |
| Age (n=85) |  |  |
| ≤ 1 year old | 5 | 5.9 |
| 1 - 2 years old | 17 | 20.0 |
| 3 - 4 years old | 29 | 34.1 |
| > 4 years old | 34 | 40.0 |
| Owner reported health of dog (n=85) |  |  |
| Fair | 8 | 9.4 |
| Good | 8 | 9.4 |
| Very good | 36 | 42.4 |
| Excellent | 33 | 38.8 |
| Skin allergies or infection in past 6 months (n=85) |  |  |
| Yes | 51 | 60.0 |
| No | 34 | 40.0 |
| Antimicrobial use in last 6 months (n=84) |  |  |
| Yes | 21 | 24.7 |
| No | 63 | 74.1 |
| Antimicrobial use during sampling (n=85) |  |  |
| Yes | 5 | 5.9 |
| No | 80 | 94.1 |
| Hospital visit in last 6 months (n=84) |  |  |
| Yes | 66 | 77.6 |
| No | 18 | 21.2 |
| Hospitalization (n=84) |  |  |
| Yes | 8 | 9.4 |
| No | 76 | 89.4 |
| Socialize with other dogs (n=85) |  |  |
| Yes | 59 | 69.4 |
| No | 26 | 30.6 |
| Number dogs in household (n=84) |  |  |
| Single | 48 | 56.5 |
| Multiple | 38 | 44.7 |

**Table A3** Description of animal contact surfaces and human contact surfaces sampled from different areas at the small animal clinic

| **Area** | **Animal contact surfaces** | **Human contact surfaces** |
| --- | --- | --- |
| Consultation room | Top of examination table, stethoscope bell/diaphragm, otoscope speculum, ophthalmoscope | 2 computer keyboards & mice, stethoscope, otoscope & ophthalmoscope handles, microscope knobs, door knobs, water tap handles, drawer/cabinet handles, hand sanitizer container surface |
| Outpatient hallway | Weighing scale surfaces where animals are placed/stand |  |
| Inpatient hallway | Weighing scale surfaces where animal is placed/stands |  |
| Work station |  | 4 computer keyboards & mice |
| Treatment room | 3 examination tables, stethoscope bell/diaphragm, muzzles, collars, leashes, hair clipper blades | Telephone handle/dial, stethoscope, otoscope & ophthalmoscope handles, drawer/cabinet handles, infusion pump |
| Laboratory |  | Fridge handles, door knobs, machine keypads, keyboards, drawer/cabinet handles |
| Anesthesia room | 2 examination tables, stretcher, face masks | Door knobs, drawer/cabinet handles |
| Surgical suite | Surgical table | Door knobs, infusion pump |
