# Supplementary material for: Emergence of methicillin-resistant Staphylococcus pseudintermedius (MRSP) in dogs in the island nation of Grenada, West Indies
Source: Research Square preprint supplement (doi:10.21203/rs.3.rs-6306236/v1), 2025-07-23
Supplement: Supplementary file 5 [file 610b64105ee910f9b2df0288.xlsx]

## Sheet: Table 4
Table 4. Antimicrobial resistance in S. pseudintermedius isolates from dogs & environmental surfaces
Antibiotic	Local dogs (n=79)			Visiting dogs (n=63)			Dogs with CD (n=6)			ES (n=10)			Overall (n=158)
	n resistant	%		n resistant	%		n resistant	%		n resistant	%		n resistant	%
Ampicillin	42	53.1646		40	63.4921		5	83.3333		2	20		89	56.3291
Tetracycline	26	32.9114		28	44.4444		3	50		3	30		60	37.9747
Erythromycin*	5	6.32911		16	25.3968		1	16.6667		1	10		23	14.557
Trimethoprim/sulfamethoxazole	7	8.86076		10	15.873		2	33.3333		1	10		20	12.6582
Clindamycin*	3	3.79747		9	14.2857		1	16.6667		0	0		13	8.22785
Oxacillin	5	6.32911		10	15.873		2	33.3333		1	10		18	11.3924
Fluoroquinolone*	3	3.79747		9	14.2857		1	16.6667		1	10		14	8.86076
Gentamicin	0	0		1	1.5873		0	0		1	10		2	1.26582
Chloramphenicol*	1	1.26582		7	11.1111		0	0		1	10		9	5.6962
Vancomycin	1	1.26582		0	0		2	33.3333		0	0		3	1.89873
*Value statistically significantly different between local dogs and visiting dogs as compared by the Chi-squared test (or Fishers exact test if count is <5), with level of significance = 0.05. The analysis was performed using R software.
CD: Clinical dermatitis
