# Supplementary material for: Emergence of methicillin-resistant Staphylococcus pseudintermedius (MRSP) in dogs in the island nation of Grenada, West Indies
Source: Research Square preprint supplement (doi:10.21203/rs.3.rs-6306236/v1), 2025-07-23
Supplement: Supplementary file 6 [file d971d276c97853cd57e53919.xlsx]

## Sheet: Table 6
Table 6: Description of the sources and characteristics of the methicillin resistanct Staphylococcus pseudintermedius isolates (n= 12)
Isolate ID	Dog ID or source	Dog category	Country of birth	Antimicrobial use in past 6 months	Phenotypic resistance profile	Oxacillin Resistance	MLVA genotype	Visit to the SAC in past 6 months	Other
SAC3-P	SAC-2017	na	na	na	AMP_SXT_OXA_TET	OR-MRSP	84	yes	Clinical dermatitis case
D010-P	D010-2018	Visitor dog	USA	Clavamox, clindamycin	AMP	OS-MRSP	58	yes	Urinary tract infection
D047-O	D047-2018*	Visitor dog	Europe/Slovakia		AMP-CHL-FQR-CLI-ERY-SXT-OXA-TET	OR-MRSP	76	yes	Same kennel
D049-O	D049-2018*	Visitor dog	Europe/Slovakia	Cefpodoxine	AMP-CHL-FQR-CLI-ERY-SXT-OXA-TET	OR-MRSP	76	yes	Same kennel
D058-O	D058-2018*	Visitor dog	Europe/Slovakia		AMP-FQR-CLI-ERY-SXT-OXA-TET	OR-MRSP	76	yes	Same kennel
D063-O	D063-2018	Visitor dog	Europe/Croatia	Clindamycin, trimethylsulfate	AMP-FQR-CLI-ERY-SXT-OXA-TET	OR-MRSP	30	yes many times	On antibiotics during sampling
D063-P	D063-2018				AMP-FQR-CLI-ERY-SXT-OXA-TET	OR-MRSP	30
D068-O	D068-2018	Local dog	Grenada	Yes but no details provided	AMP-FQR-CLI-ERY-SXT-TET	OS-MRSP	30	yes	Skin condition
D068-P	D068-2018				AMP-CHL-FQR-CLI-ERY-SXT-TET	OS-MRSP	30
D087-O	D087-2018	Visitor dog	Grenada but travelled to USA	Cefodosine	AMP-FQR-CLI-ERY-OXA-TET	OR-MRSP	30	yes	Urinary tract infection
D088	D088-2018	Local dog	Grenada	Cephalexin	AMP-FQR-CLI-ERY-SXT-OXA-TET	OR-MRSP	31	yes	Fair health & skin condition
ES26	Environment	na	na	na	AMP-CHL-FQR-CLI-ERY-SXT-OXA-TET	OR-MRSP	76	Environmental sample	Animal contact surface in consultation room
AMP: ampicillin, CHL: chloramphenicol, CLI: clindamycin, FQR: fluoroquinolone, ERY: erythromycin, GEN: gentamicin, OXA: oxaxillin, TET: tetracycline, SXT: trimethoprim/sulfamethoxazole, VAN: vancomycin
OR-MRSP: oxacillin resistant methicillin resistanct S. pseudintermedius, OS-MRSP: oxacillin susceptible methicillin resistanct S. pseudintermedius
